# Supplementary material for: A tough, adhesive, self-healable, and antibacterial plant-inspired hydrogel based on pyrogallol–borax dynamic cross-linking
Source: Royal Society of Chemistry journal article supplement (doi:10.1039/d1tb00763g), 2021-01-01
Supplement: d1tb00763g1.pdf [file d1tb00763g1.pdf]

1 **Supporting information**

2 **Tough, Adhesive, Self-healable, and Antibacterial Plant-inspired**  
3 **Hydrogel Based on Pyrogallol-Borax Dynamic Cross-linking**

4 Chao Ma<sup>a,b</sup>, Huiwen Pang<sup>a,b</sup>, Hongguang Liu <sup>a,b</sup>, Qian Yan <sup>a,b</sup>, Jianzhang Li<sup>a,b</sup>, and  
5 Shifeng Zhang<sup>a,b,\*</sup>

6 <sup>a</sup> Beijing Key Laboratory of Wood Science and Engineering, Beijing Forestry  
7 University, No. 35 Tsinghua East Road, Haidian District, Beijing 100083, P. R. China.

8 <sup>b</sup> MOE Key Laboratory of Wooden Material Science and Application, Beijing Forestry  
9 University, No. 35 Tsinghua East Road, Haidian District, Beijing 100083, P. R. China.

10 \* Corresponding Author.

11 E-mail: shifeng.zhang@bjfu.edu.cn (S. Zhang).

12

13 The supporting information includes 4 pages and 3 Figures as well as 2  
14 Tables.

15

16 **This supplement contains:**

17 **Figure S1.** Macroscopic photographs of PG/Borax solutions with different molar ratios  
18 and structures speculated of PG-borax complexes.

19 **Figure S2.** Rheological properties of hydrogels.

20 **Figure S3.** Swelling behaviors and microstructure of hydrogels.

21 **Table S1.** The compositions of PG/borax aqueous solution.

22 **Table S2.** The compositions of various hydrogels.

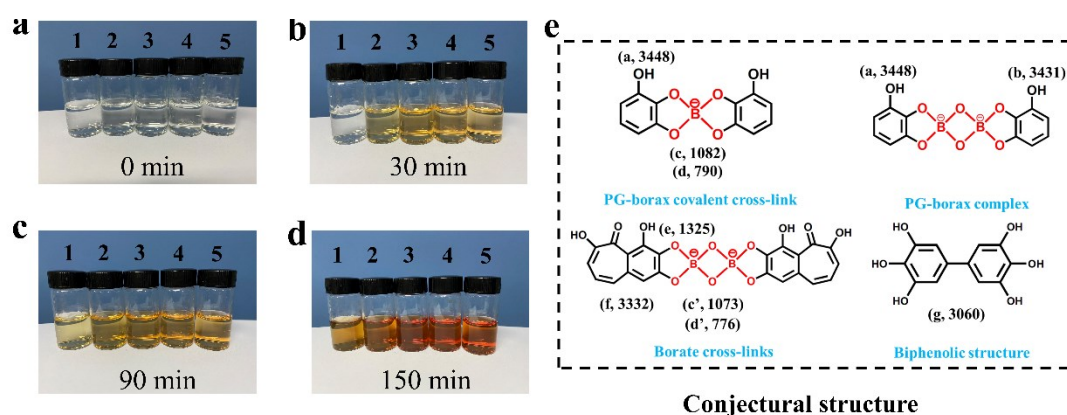

**Figure S1.** (a)-(b) Macroscopic photographs of PG/Borax solutions with different molar ratios. (e) Structures speculated of PG-borax complexes.

The PG solution without addition of borax (1, Table S1) is relatively steady under acidic conditions. Visual inspection of color evolution of PG solution with addition of borax confirms its oxidization to quinone in a basic pH (2-5, Table S1). Moreover, PG/borax solution developed a light brown color with increasing concentration of borax, which is indicative of the formation of PG/borax complex and indicating that borax has inhibition effect on PG oxidation.

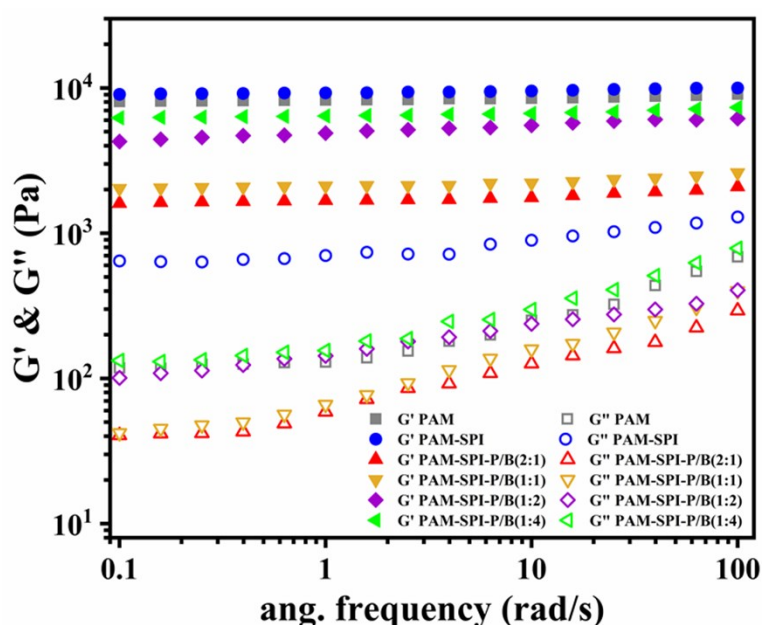

**Figure S2.** Rheological properties of hydrogels.

As shown in the Figure S2, all the hydrogels displayed dominant elastic solid

1 behavior, with the storage modulus ( $G'$ )  $\gg$  loss modulus ( $G''$ ) over the entire frequency  
2 range. With the increase of molar ratio of PG and borax, both the  $G'$  and  $G''$  of the  
3 copolymers were enhanced obviously, indicating a higher cross-linking density and  
4 stronger cohesion.

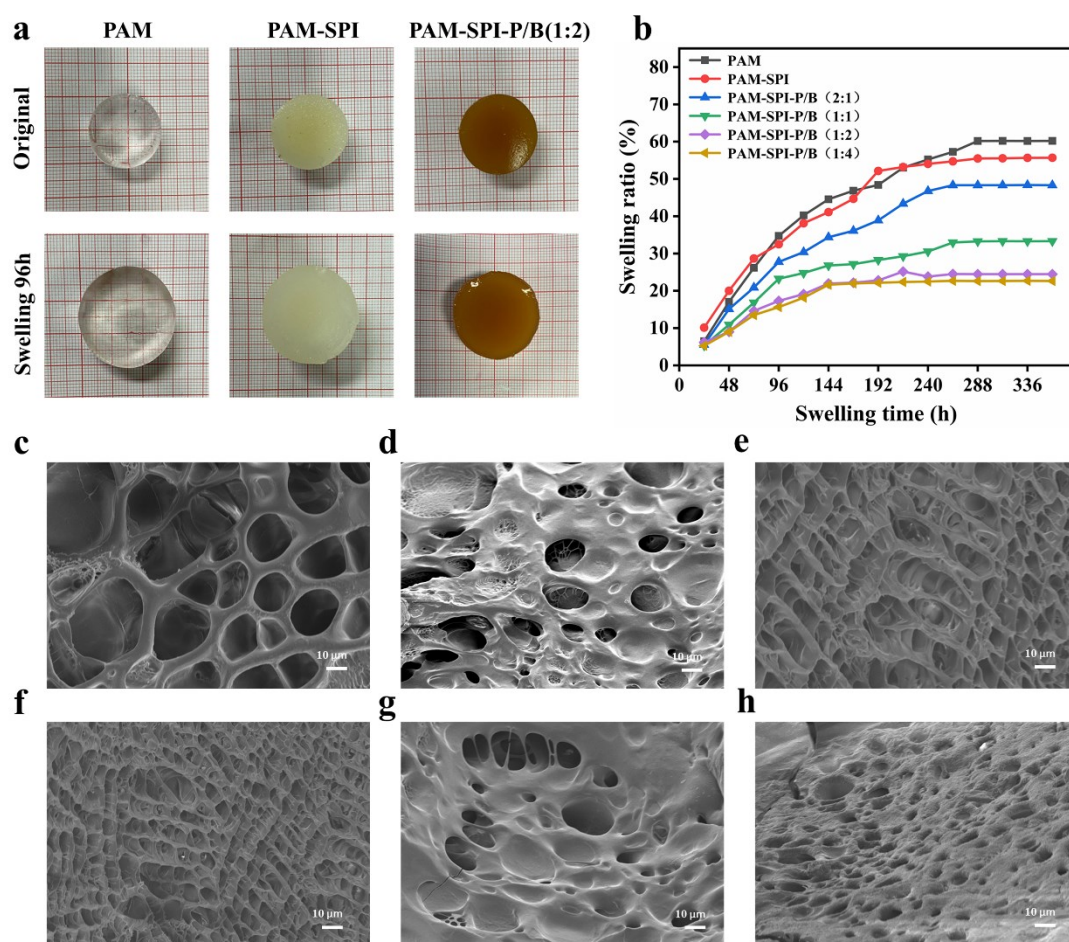

5 **Figure S3.** (a) Swelling photographs of PAM hydrogel, PAM-SPI hydrogel, and PAM-  
6 SPI-P/B hydrogel. (b) Swelling curves of the hydrogels. (c)-(h) The SEM images of  
7 PAM hydrogel, PAM-SPI hydrogel, PAM-SPI-P/B (2:1) hydrogel, PAM-SPI-P/B (1:1)  
8 hydrogel, PAM-SPI-P/B (1:2) hydrogel, and PAM-SPI-P/B (1:4) hydrogel.

10 In the Figure S3, the swelling ratio of PAM-SPI-P/B hydrogels decreased as the  
11 feeding ratio of PG and borax increased because of the subsequent increase in  
12 crosslinking degree. The incorporation of PG and borax had a significant effect on the  
13 microstructure of hydrogels lead to a lower swelling rate.

1

**Table S1.** The compositions of PG/borax aqueous solution

| PG/Borax<br>Solution | PG<br>(mg/ml) | Borax<br>(mg/ml) | molar ratio<br>(PG/Borax) |
|----------------------|---------------|------------------|---------------------------|
| 1                    | 1.8           | 0                | 0                         |
| 2                    | 1.8           | 2.9              | 2                         |
| 3                    | 1.8           | 5.8              | 1                         |
| 4                    | 1.8           | 11.6             | 0.5                       |
| 5                    | 1.8           | 23.2             | 0.25                      |

2

3

4

**Table S2.** The compositions of various hydrogels

| Hydrogels            | PG<br>(mg) | Borax<br>(mg) | SPI<br>(g) | AM<br>(g) | APS<br>(g) | BIS<br>(g) | TEMED<br>( $\mu$ l) | H <sub>2</sub> O<br>(wt.%) |
|----------------------|------------|---------------|------------|-----------|------------|------------|---------------------|----------------------------|
| PAM                  | 0          | 0             | 0          | 2.5       | 0.25       | 0.025      | 20                  | 80                         |
| PAM-SPI              | 0          | 0             | 0.25       | 2.5       | 0.25       | 0.025      | 20                  | 80                         |
| PAM-SPI-<br>P/B(2:1) | 18         | 29            | 0.25       | 2.5       | 0.25       | 0.025      | 20                  | 80                         |
| PAM-SPI-<br>P/B(1:1) | 18         | 58            | 0.25       | 2.5       | 0.25       | 0.025      | 20                  | 80                         |
| PAM-SPI-<br>P/B(1:2) | 18         | 116           | 0.25       | 2.5       | 0.25       | 0.025      | 20                  | 80                         |
| PAM-SPI-<br>P/B(1:4) | 18         | 232           | 0.25       | 2.5       | 0.25       | 0.025      | 20                  | 80                         |

5
